# Supplementary material for: A single-column and efficient procedure for separating Fe and Mg from geological materials for isotopic analyses using MC-ICP-MS
Source: Royal Society of Chemistry journal article supplement (doi:10.1039/d4ja00272e), 2024-01-01
Supplement: d4ja00272e1.pdf [file d4ja00272e1.pdf]

## Supplementary material for

A single-column and efficient procedure for separating Fe and Mg from geological materials for isotopic analyses using MC-ICP-MS

Guanhong Zhu <sup>a</sup>, Zhenmin Ge <sup>a,b</sup>, Le Zhang <sup>a</sup>, Gangjian Wei <sup>a</sup>, and Jinlong Ma<sup>\*a</sup>

<sup>a</sup> State Key Laboratory of Isotope Geochemistry, CAS Center for Excellence in Deep Earth Science, Guangzhou Institute of Geochemistry, Chinese Academy of Sciences, Guangzhou 510640, China

<sup>b</sup> College of Earth and Planetary Sciences, University of Chinese Academy of Sciences, Beijing, 100049, China

### The contents include:

Table S1. Fe isotopic results of individual measurement of geological reference materials.

| Sample ID | $\delta^{56}\text{Fe}$ (‰) | 2se (‰) | $\delta^{57}\text{Fe}$ (‰) | 2se (‰) |
|-----------|----------------------------|---------|----------------------------|---------|
| BCR-2-1   | 0.12                       |         | 0.23                       |         |
| BCR-2-2   | 0.11                       |         | 0.19                       |         |
| BCR-2-3   | 0.14                       |         | 0.25                       |         |
| BCR-2-4   | 0.09                       |         | 0.18                       |         |
| BCR-2-5   | 0.16                       | 0.04    | 0.26                       | 0.06    |
| BCR-2-6   | 0.11                       |         | 0.25                       |         |
| BCR-2-7   | 0.12                       |         | 0.21                       |         |
| BCR-2-8   | 0.11                       |         | 0.13                       |         |
| BCR-2-9   | 0.13                       |         | 0.19                       |         |
| BHVO-2-1  | 0.15                       |         | 0.27                       |         |
| BHVO-2-2  | 0.12                       | 0.03    | 0.16                       | 0.05    |
| BHVO-2-3  | 0.06                       |         | 0.11                       |         |
| SARM4-1   | 0.14                       | 0.03    | 0.21                       | 0.06    |

|         |      |      |      |      |
|---------|------|------|------|------|
| SARM4-2 | 0.11 |      | 0.19 |      |
| SARM4-3 | 0.07 |      | 0.10 |      |
| SARM4-4 | 0.09 |      | 0.12 |      |
| SARM4-5 | 0.10 |      | 0.18 |      |
| AGV-1-1 | 0.18 |      | 0.23 |      |
| AGV-1-2 | 0.08 |      | 0.12 |      |
| AGV-1-3 | 0.09 |      | 0.14 |      |
| AGV-1-4 | 0.10 |      | 0.12 |      |
| AGV-1-5 | 0.11 | 0.04 | 0.16 | 0.06 |
| AGV-1-6 | 0.07 |      | 0.11 |      |
| AGV-1-7 | 0.09 |      | 0.17 |      |
| AGV-1-8 | 0.12 |      | 0.20 |      |
| AGV-1-9 | 0.08 |      | 0.09 |      |
| G-2-1   | 0.18 |      | 0.23 |      |
| G-2-2   | 0.15 |      | 0.22 |      |
| G-2-3   | 0.14 | 0.04 | 0.28 | 0.06 |
| G-2-4   | 0.13 |      | 0.15 |      |
| G-2-5   | 0.15 |      | 0.28 |      |
| G-2-6   | 0.17 |      | 0.22 |      |
| GA-1    | 0.14 |      | 0.19 |      |
| GA-2    | 0.17 |      | 0.25 |      |
| GA-3    | 0.13 |      | 0.24 |      |
| GA-4    | 0.15 |      | 0.22 |      |
| GA-5    | 0.11 | 0.03 | 0.23 | 0.05 |
| GA-6    | 0.14 |      | 0.21 |      |
| GA-7    | 0.17 |      | 0.24 |      |
| GA-8    | 0.15 |      | 0.19 |      |
| GA-9    | 0.11 |      | 0.22 |      |

---

“se” represents the mean values of the standard error for the individual analyses.

Table S2. Mg isotopic results of individual measurement of geological reference materials.

| <b>Sample ID</b> | <b><math>\delta^{26}\text{Mg}</math> (‰)</b> | <b>2se (‰)</b> | <b><math>\delta^{25}\text{Mg}</math> (‰)</b> | <b>2se (‰)</b> |
|------------------|----------------------------------------------|----------------|----------------------------------------------|----------------|
| BHVO-2-1         | -0.18                                        |                | -0.10                                        |                |
| BHVO-2-2         | -0.19                                        |                | -0.09                                        |                |
| BHVO-2-3         | -0.15                                        |                | -0.05                                        |                |
| BHVO-2-4         | -0.14                                        |                | -0.04                                        |                |
| BHVO-2-5         | -0.23                                        |                | -0.11                                        |                |
| BHVO-2-6         | -0.19                                        |                | -0.07                                        |                |
| BHVO-2-7         | -0.15                                        | 0.02           | -0.06                                        | 0.02           |
| BHVO-2-8         | -0.18                                        |                | -0.09                                        |                |
| BHVO-2-9         | -0.18                                        |                | -0.10                                        |                |
| BHVO-2-10        | -0.19                                        |                | -0.10                                        |                |
| BHVO-2-11        | -0.18                                        |                | -0.08                                        |                |
| BHVO-2-12        | -0.19                                        |                | -0.07                                        |                |
| BHVO-2-13        | -0.25                                        |                | -0.10                                        |                |
| BHVO-2-14        | -0.24                                        |                | -0.10                                        |                |
| BCR-2-1          | -0.19                                        |                | -0.07                                        |                |
| BCR-2-2          | -0.22                                        |                | -0.13                                        |                |
| BCR-2-3          | -0.20                                        |                | -0.10                                        |                |
| BCR-2-4          | -0.10                                        |                | -0.04                                        |                |
| BCR-2-5          | -0.10                                        | 0.02           | -0.02                                        | 0.02           |
| BCR-2-6          | -0.25                                        |                | -0.13                                        |                |
| BCR-2-7          | -0.25                                        |                | -0.12                                        |                |
| BCR-2-8          | -0.17                                        |                | -0.08                                        |                |
| BCR-2-9          | -0.13                                        |                | -0.06                                        |                |
| JB-1-1           | -0.22                                        |                | -0.12                                        |                |
| JB-1-2           | -0.22                                        |                | -0.12                                        |                |
| JB-1-3           | -0.24                                        | 0.02           | -0.12                                        | 0.03           |
| JB-1-4           | -0.19                                        |                | -0.11                                        |                |
| JB-1-5           | -0.20                                        |                | -0.10                                        |                |
| JB-1-6           | -0.22                                        |                | -0.07                                        |                |
| SARM4-1          | -0.17                                        |                | -0.07                                        |                |
| SARM4-2          | -0.20                                        | 0.02           | -0.10                                        | 0.02           |
| SARM4-3          | -0.24                                        |                | -0.10                                        |                |
| SARM4-4          | -0.22                                        |                | -0.09                                        |                |

|         |       |      |       |      |
|---------|-------|------|-------|------|
| SARM4-5 | -0.20 |      | -0.09 |      |
| SARM4-6 | -0.22 |      | -0.11 |      |
| SARM4-7 | -0.23 |      | -0.11 |      |
| AGV-1-1 | -0.10 |      | -0.05 |      |
| AGV-1-2 | -0.04 |      | -0.03 |      |
| AGV-1-3 | -0.10 | 0.02 | -0.06 | 0.02 |
| AGV-1-4 | -0.11 |      | -0.06 |      |
| AGV-1-5 | -0.05 |      | 0.00  |      |
| AGV-1-6 | -0.03 |      | -0.03 |      |
| G-2-1   | -0.27 |      | -0.10 |      |
| G-2-2   | -0.25 |      | -0.12 |      |
| G-2-3   | -0.09 | 0.03 | -0.04 | 0.03 |
| G-2-4   | -0.20 |      | -0.08 |      |
| G-2-5   | -0.27 |      | -0.14 |      |
| G-2-6   | -0.14 |      | -0.08 |      |
| GA-1    | -0.26 |      | -0.11 |      |
| GA-2    | -0.27 |      | -0.10 |      |
| GA-3    | -0.20 | 0.02 | -0.13 | 0.03 |
| GA-4    | -0.23 |      | -0.12 |      |
| GA-5    | -0.23 |      | -0.11 |      |
| GA-6    | -0.17 |      | -0.07 |      |
| IAPSO-1 | -0.81 |      | -0.44 |      |
| IAPSO-2 | -0.80 |      | -0.39 |      |
| IAPSO-3 | -0.83 | 0.02 | -0.45 | 0.02 |
| IAPSO-4 | -0.79 |      | -0.42 |      |
| IAPSO-5 | -0.83 |      | -0.41 |      |
| IAPSO-6 | -0.88 |      | -0.44 |      |
| JDo-1-1 | -2.41 |      | -1.26 |      |
| JDo-1-2 | -2.41 |      | -1.23 |      |
| JDo-1-3 | -2.36 | 0.03 | -1.26 | 0.03 |
| JDo-1-4 | -2.25 |      | -1.18 |      |
| JDo-1-5 | -2.20 |      | -1.12 |      |

---

“se” represents the mean values of the standard error for the individual analyses.
